# Supplementary material for: Honeybee (Apis spp.) (Hymenoptera: Apidae) Colony Monitoring Using Acoustic Signals from the Beehive: An Assessment by Global Experts and Our Feedback
Source: MDPI journal article supplement (doi:10.3390/agriculture13040769), 2023-03-27
Supplement: s1 [file s1]

Archive with 3 entries (3 files):
- agriculture-2262659-Appendix A.pdf
- agriculture-2262659-Appendix B.pdf
- agriculture-2262659-Supplementary file.pdf
