# Supplementary material for: Honeybee (Apis spp.) (Hymenoptera: Apidae) Colony Monitoring Using Acoustic Signals from the Beehive: An Assessment by Global Experts and Our Feedback
Source: MDPI journal article supplement (doi:10.3390/agriculture13040769), 2023-03-27
Supplement: s1 [file s1]

*Supplementary information*

**A global expert assessment on the role of beehive acoustic-based honeybee (*Apis* spp.) (Apidae; Hymenoptera) colony monitoring**

**Supplementary figures regarding personal information of experts/researchers:**

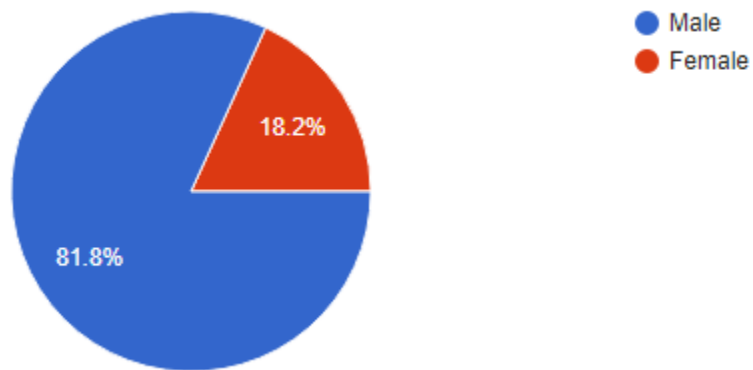

**Figure 1:** Participation of each gender (%) to respond to the questionnaire.

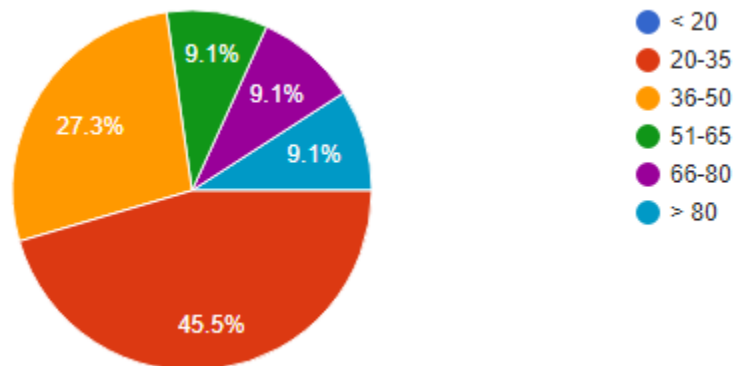

**Figure 2:** Age of participants who have given their responses to the questionnaire.

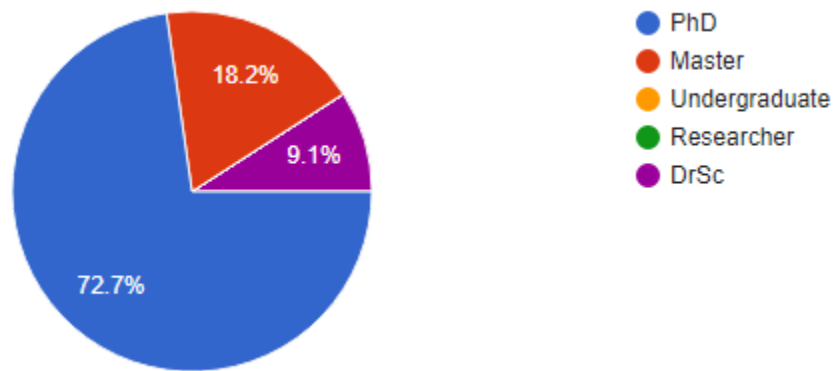

Figure 3: Level of education of the experts who provided their feedback via a questionnaire.

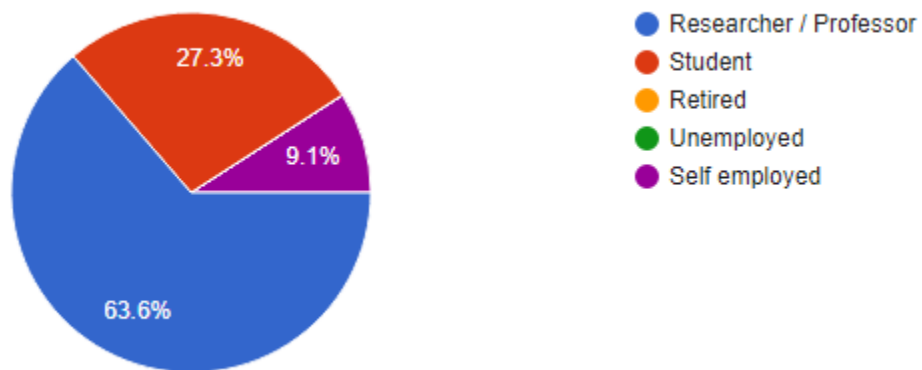

Figure 4: Employment status of the experts who participated to respond the questionnaire.
